# Supplementary material for: Synthesis and characterization of a novel CNT-FeNi3/DFNS/Cu(ii) magnetic nanocomposite for the photocatalytic degradation of tetracycline in wastewater
Source: RSC Adv. 2019 Oct 30;9(60):35022–32. doi: 10.1039/c9ra05817f (PMC9074154; doi:10.1039/c9ra05817f)
Supplement: RA-009-C9RA05817F-s001 [file RA-009-C9RA05817F-s001.pdf]

## Synthesis and characterizations of a novel CNT-FeNi<sub>3</sub>/DFNS/Cu (II) magnetic nanocomposite for photocatalytic degradation of tetracycline in wastewater

Yanhua Zhao<sup>a</sup>, Jie Juan Tang<sup>\*b</sup>, Alireza Motavalizadehkakhky<sup>\*c</sup>, Saeid Kakooei<sup>d</sup>, Seyed Mohsen Sadeghzadeh<sup>e,f</sup>

<sup>a</sup>*School of Economics and Management Langfang Normal University, Langfang, 065000, China.*

<sup>b</sup>*School of Humanities, Tianjin Agricultural University, Tianjin 300384, China.*

<sup>c</sup>*Department of Chemistry, Faculty of Sciences, Neyshabur Branch, Islamic Azad University, Neyshabur, Iran.*

<sup>d</sup>*Centre for Corrosion Research, Department of Mechanical Engineering, Faculty of Engineering, Universiti Teknologi PETRONAS, 32610 Seri Iskandar, Perak Darul Ridzuan, Malaysia.*

<sup>e</sup>*New Materials Technology and Processing Research Center, Department of Chemistry, Neyshabur Branch, Islamic Azad University, Neyshabur, Iran.*

<sup>f</sup>*Young Researchers and Elite Club, Neyshabur Branch, Islamic Azad university, Neyshabur, Iran.*

E-mail: [amotavalizadeh@yahoo.com](mailto:amotavalizadeh@yahoo.com) (A. Motavalizadehkakhky); [daishuxue2000@126.com](mailto:daishuxue2000@126.com) (J.J. Tang).

### Supporting Information

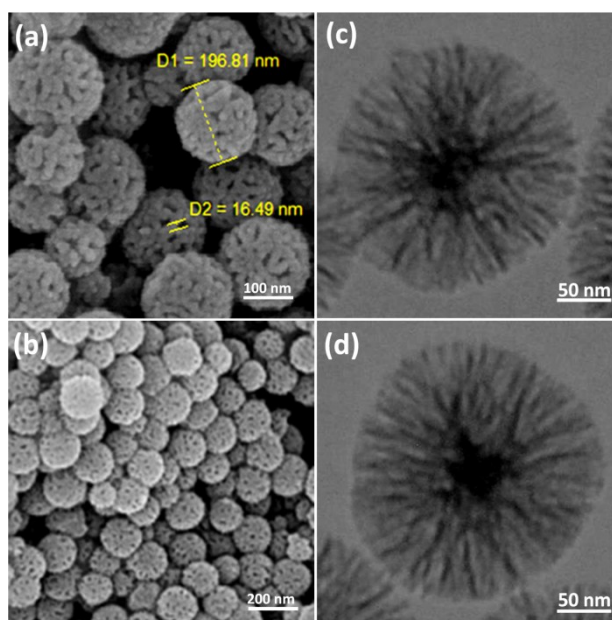

**Figure S1** TEM images of FeNi<sub>3</sub>/DFNS MNPs (a); FeNi<sub>3</sub>/DFNS/Cu (II) complexes MNPs (b); FE-SEM images of FeNi<sub>3</sub>/DFNS MNPs (c); FeNi<sub>3</sub>/DFNS/Cu (II) complexes MNPs (d).

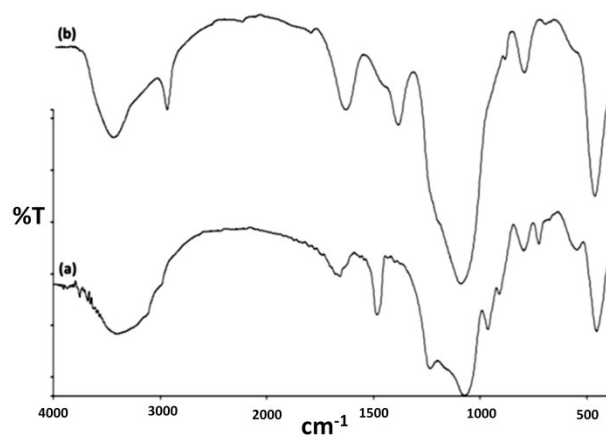

**Figure S2** FTIR spectra of (a) FeNi<sub>3</sub>/DFNS MNPs, and (b) FeNi<sub>3</sub>/DFNS/PEI MNPs.

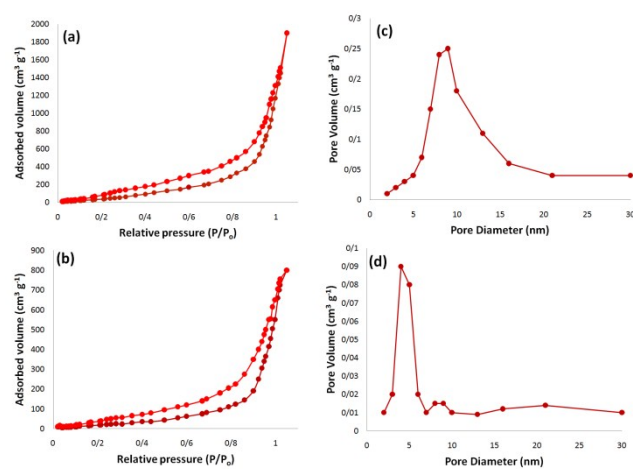

**Figure S3** adsorption-desorption isotherms of the FeNi<sub>3</sub>/DFNS NPs (a); FeNi<sub>3</sub>/DFNS/Cu (II) complexes MNPs (b); and BJH pore size distributions of the FeNi<sub>3</sub>/DFNS NPs (c); FeNi<sub>3</sub>/DFNS/Cu (II) complexes MNPs (d).

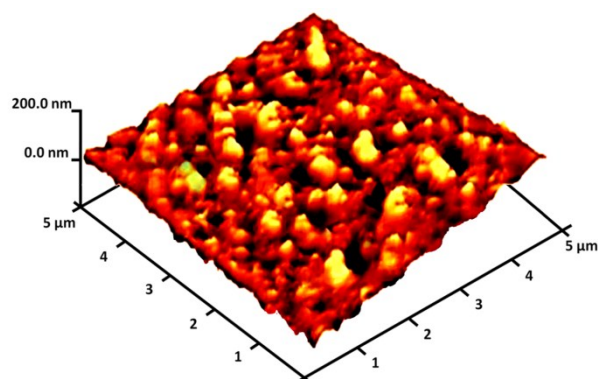

**Figure S4** Three-dimensional of AFM images of FeNi<sub>3</sub>/DFNS/Cu (II) complexes MNPs.

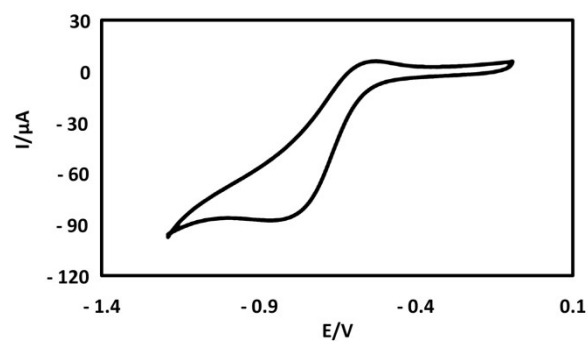

**Figure S5** Cyclic voltammogram of copper(II) complex.

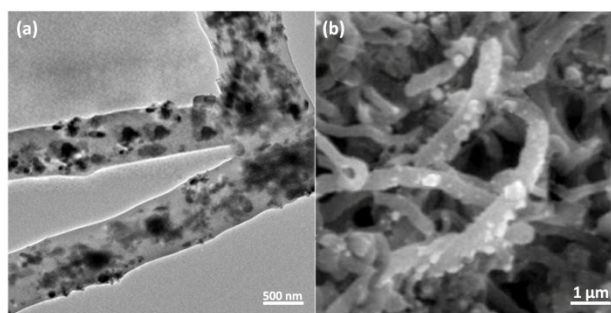

**Figure S6** SEM images of a) CNT-FeNi<sub>3</sub>/DFNS/Cu MNPs, and TEM images of b) CNT-FeNi<sub>3</sub>/DFNS/Cu MNPs.

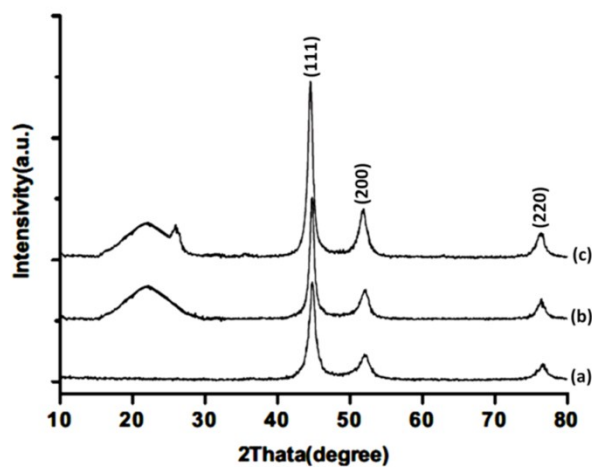

**Figure S7** XRD analysis of (a) FeNi<sub>3</sub>, (b) FeNi<sub>3</sub>/DFNS/Cu (II), and (c) CNT-FeNi<sub>3</sub>/DFNS/Cu (II) complexes MNPs.

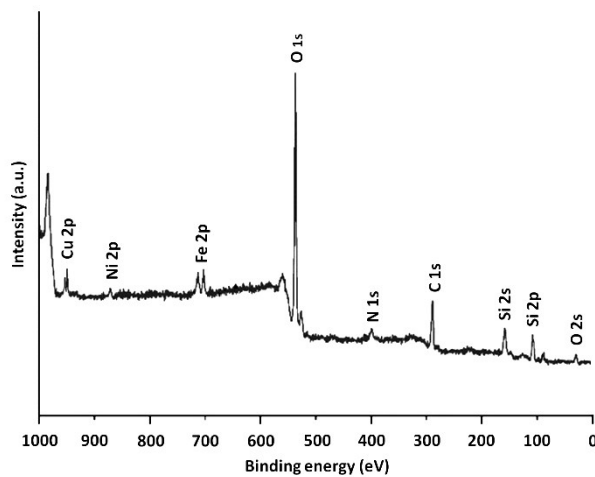

**Figure S8** XPS spectra of CNT-FeNi<sub>3</sub>/DFNS/Cu MNPs.

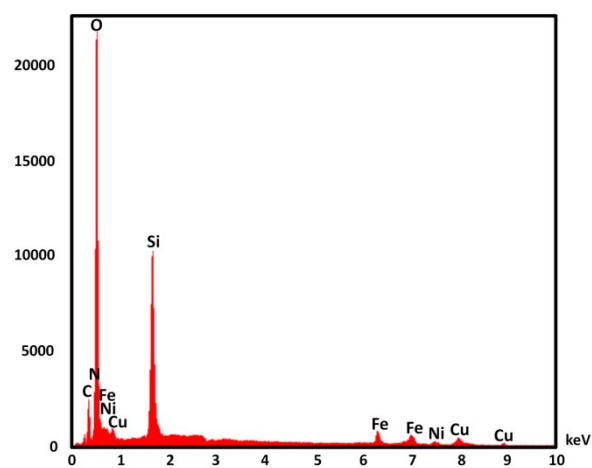

**Figure S9** The EDX spectra of CNT-FeNi<sub>3</sub>/DFNS/Cu MNPs.

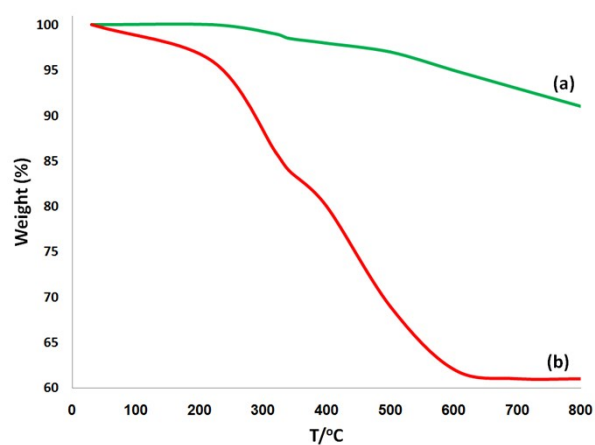

**Figure S10** TGA curve of (a) raw CNTs, and (b) CNT-FeNi<sub>3</sub>/DFNS/Cu MNPs.

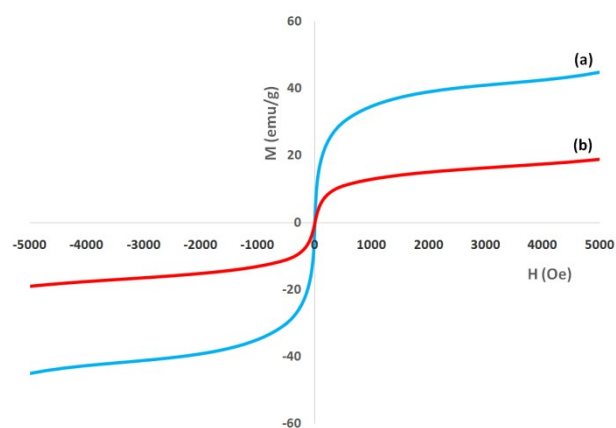

**Figure S11** Room-temperature magnetization curves of (a) FeNi<sub>3</sub>/DFNS/Cu (II), and (b) CNT-FeNi<sub>3</sub>/DFNS/Cu (II) complexes MNPs.

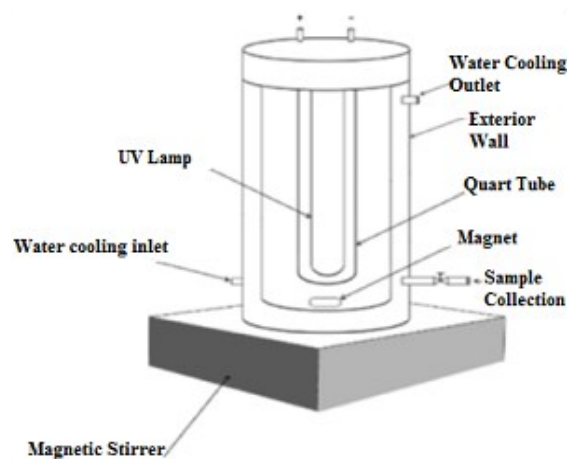

**Figure S12** Schematic of the photocatalytic reactor.

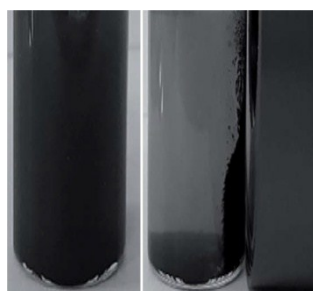

**Figure S13** Catalytic separations by magnetic attraction.

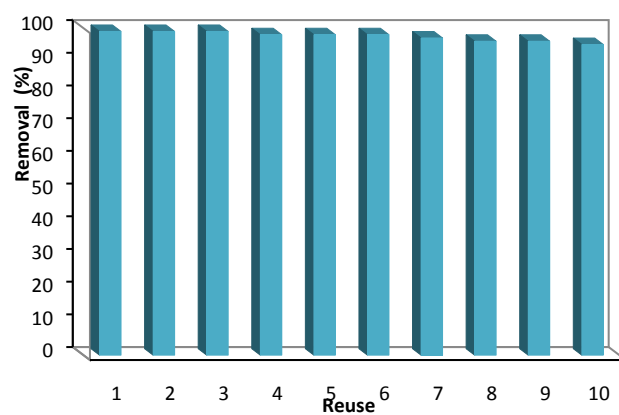

**Figure S14** The reusability of catalysts for degradation of TC.

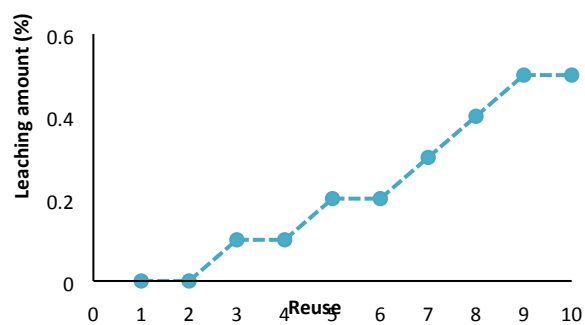

**Figure S15** Recyclability of the catalyst for degradation of TC.
